# Supplementary material for: Achieving clear ferroelectric polarization reversal in room-temperature multiferroic ε-Fe2O3 systems through grain boundary engineering
Source: Royal Society of Chemistry journal article supplement (doi:10.1039/d5tc00689a), 2025-01-01
Supplement: d5tc00689a1.pdf [file d5tc00689a1.pdf]

Supporting information for:

**Achieving clear ferroelectric polarization reversal in room-temperature multiferroic  $\epsilon$ -Fe<sub>2</sub>O<sub>3</sub> system through grain boundary engineering**

Tsukasa Katayama<sup>1,2\*</sup>, Shintaro Yasui<sup>3\*</sup>, Takahisa Shiraishi<sup>4,5</sup>, Takanori Kiguchi<sup>4,5</sup>, Badari Narayana Rao<sup>6</sup>, Yosuke Hamasaki<sup>7</sup>, and Mitsuru Itoh<sup>6,8\*</sup>

<sup>1</sup>Research Institute for Electronic Science, Hokkaido University, N20W10, Kita, Sapporo 001-0020, Japan

<sup>2</sup>JST-PRESTO, Kawaguchi, Saitama 332-0012, Japan

<sup>3</sup>Laboratory for Zero-Carbon Energy, Institute of Science Tokyo, 2-12-1, Ookayama, Meguro-ku, Tokyo 152-8550, Japan

<sup>4</sup>Department of Materials Science, Graduate School of Science and Technology, Kumamoto University, 2-39-1 Kurokami, Chuo-ku, Kumamoto 860-8555, Japan

<sup>5</sup>Magnesium Research Center, Kumamoto University, 2-39-1 Kurokami, Chuo-ku, Kumamoto 860-8555, Japan

<sup>6</sup>Laboratory for Materials and Structures, Institute of Science Tokyo, 4259, Nagatsuta-cho, Midori-ku, Yokohama 226-8501, Japan

<sup>7</sup>Department of Applied Physics, National Defense Academy, Yokosuka 239-8686, Japan

<sup>8</sup>Environmental Safety Center, Institute of Science Tokyo, 4259 Nagatsuta-cho, Midori-ku, Yokohama 226-8501, Japan

\*Corresponding authors: katayama@es.hokudai.ac.jp, yasui.s.aa@m.titech.ac.jp, mitsuru\_itoh@icloud.com

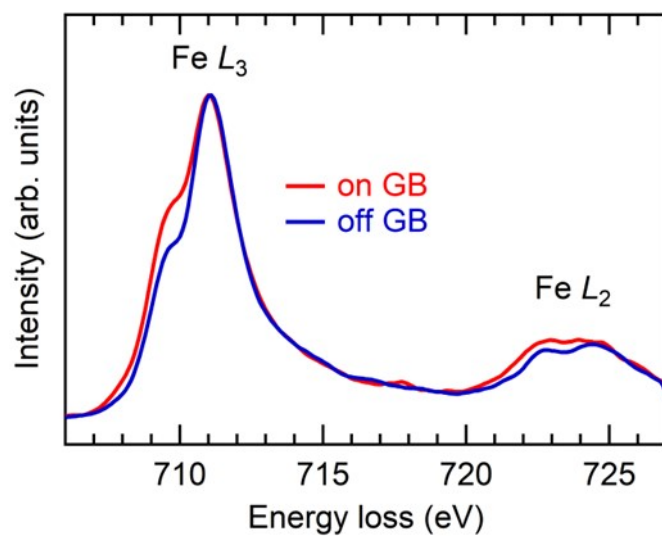

**Figure S1.** On- and off-GB Fe  $L_3$ -edge EELS spectra near the 0-120°-type grain boundaries (GBs).

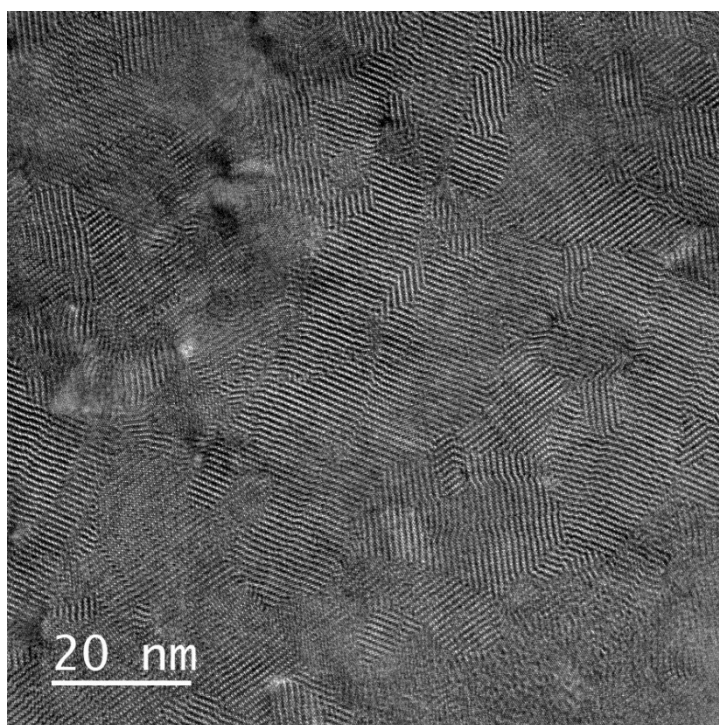

**Figure S2.** Plan-view TEM image of the Sc-doped  $\epsilon$ -Fe<sub>2</sub>O<sub>3</sub> film.
